# Supplementary material for: Guest-mediated phase transitions in a flexible pillared-layered metal–organic framework under high-pressure
Source: Royal Society of Chemistry journal article supplement (doi:10.1039/d1sc03108b), 2021-01-01
Supplement: d1sc03108b1.pdf [file d1sc03108b1.pdf]

## Guest-Mediated Phase Transitions in a Flexible Pillared-Layered Metal-Organic Framework under High-Pressure

Gemma F. Turner,<sup>a</sup> Scott C. McKellar,<sup>b</sup> David R. Allan,<sup>c</sup> Anthony K. Cheetham,<sup>d</sup> Sebastian Henke,<sup>\*e</sup> and Stephen A. Moggach<sup>\*a</sup>

---

<sup>a</sup> School of Molecular Sciences, University of Western Australia, Perth, 6009, Western Australia, Australia

<sup>b</sup> EastChem School of Chemistry, University of Edinburgh, Edinburgh, EH9 3JW, United Kingdom

<sup>c</sup> Diamond Light Source, Harwell Science and Innovation Campus, Didcot, O11 0DE, United Kingdom

<sup>d</sup> Materials Research Laboratory, University of California, Santa Barbara, CA 93106, USA

<sup>e</sup> Fakultät für Chemie und Chemische Biologie, Technische Universität Dortmund, Dortmund, 44227, Germany

## Table of Contents

|                                     |     |
|-------------------------------------|-----|
| 1. Crystallographic data .....      | 1-3 |
| 2. Pore Volume and Contents .....   | 4   |
| 3. Thermogravimetric Analysis ..... | 5-6 |
| 4. FT-IR Spectroscopy.....          | 7   |
| 5. Twin Analysis .....              | 8   |

## 1. Crystallographic Data

**Supplementary Table S1.** Experimental and crystallographic data for Zn<sub>2</sub>bdc<sub>2</sub>dabco-X(EtOH) (**1**) in a PTM of EtOH at  $T = 298$  K. Diffraction experiments were carried out on a Bruker Apex II diffractometer using a Mo X-ray source. Absorption was corrected for by multi-scan methods, SADABS (Siemens, 1996).

|                                                                              | Ambient                                                                                                                              | 0.31 GPa                                                                                                                             | 0.69 GPa                                                                                                                             | 1.19 GPa                                                                                                                              | 2.10 GPa                                                                                                                              |
|------------------------------------------------------------------------------|--------------------------------------------------------------------------------------------------------------------------------------|--------------------------------------------------------------------------------------------------------------------------------------|--------------------------------------------------------------------------------------------------------------------------------------|---------------------------------------------------------------------------------------------------------------------------------------|---------------------------------------------------------------------------------------------------------------------------------------|
| <b>Crystal data</b>                                                          |                                                                                                                                      |                                                                                                                                      |                                                                                                                                      |                                                                                                                                       |                                                                                                                                       |
| Chemical formula                                                             | (C <sub>22</sub> H <sub>12</sub> N <sub>2</sub> O <sub>8</sub> Zn <sub>2</sub> ) <sub>n</sub> ·3.9n(C <sub>2</sub> H <sub>6</sub> O) | (C <sub>22</sub> H <sub>12</sub> N <sub>2</sub> O <sub>8</sub> Zn <sub>2</sub> ) <sub>n</sub> ·7.8n(C <sub>2</sub> H <sub>6</sub> O) | (C <sub>22</sub> H <sub>12</sub> N <sub>2</sub> O <sub>8</sub> Zn <sub>2</sub> ) <sub>n</sub> ·8.1n(C <sub>2</sub> H <sub>6</sub> O) | (C <sub>22</sub> H <sub>12</sub> N <sub>2</sub> O <sub>8</sub> Zn <sub>2</sub> ) <sub>n</sub> ·11.9n(C <sub>2</sub> H <sub>6</sub> O) | (C <sub>22</sub> H <sub>12</sub> N <sub>2</sub> O <sub>8</sub> Zn <sub>2</sub> ) <sub>n</sub> ·11.9n(C <sub>2</sub> H <sub>6</sub> O) |
| $M_r$                                                                        | 756.90                                                                                                                               | 936.56                                                                                                                               | 950.39                                                                                                                               | 1125.4                                                                                                                                | 1125.4                                                                                                                                |
| Crystal system, space group                                                  | Tetragonal, <i>P4/mmm</i>                                                                                                            | Tetragonal, <i>P4/mmm</i>                                                                                                            | Tetragonal, <i>P4/mmm</i>                                                                                                            | Monoclinic, <i>C2/m</i>                                                                                                               | Monoclinic, <i>C2/m</i>                                                                                                               |
| $a, b, c$ (Å)                                                                | 10.91350(4), 10.91350(4), 9.62600(4)                                                                                                 | 10.98050(4), 10.98050(4), 9.72200(4)                                                                                                 | 10.98300(4), 10.98300(4), 9.27200(4)                                                                                                 | 14.4123(12), 16.3757(13), 9.7030(4)                                                                                                   | 14.177(3), 16.361(3), 9.6086(11)                                                                                                      |
| $\alpha, \beta, \gamma$ (°)                                                  | 90, 90, 90                                                                                                                           | 90, 90, 90                                                                                                                           | 90, 90, 90                                                                                                                           | 90, 92.158(4), 90                                                                                                                     | 90, 92.168(10), 90                                                                                                                    |
| $V$ (Å <sup>3</sup> )                                                        | 1146.50(1)                                                                                                                           | 1172.20(1)                                                                                                                           | 1118.45(1)                                                                                                                           | 2288.4(3)                                                                                                                             | 2227.1(6)                                                                                                                             |
| $Z$                                                                          | 1                                                                                                                                    | 1                                                                                                                                    | 1                                                                                                                                    | 2                                                                                                                                     | 2                                                                                                                                     |
| $\rho$ (g cm <sup>-3</sup> )                                                 | 1.097                                                                                                                                | 1.329                                                                                                                                | 1.348                                                                                                                                | 1.633                                                                                                                                 | 1.678                                                                                                                                 |
| Crystal size (mm)                                                            | 0.05 × 0.15 × 0.15                                                                                                                   | 0.05 × 0.15 × 0.15                                                                                                                   | 0.05 × 0.15 × 0.15                                                                                                                   | 0.05 × 0.15 × 0.15                                                                                                                    | 0.05 × 0.15 × 0.15                                                                                                                    |
| <b>Data collection</b>                                                       |                                                                                                                                      |                                                                                                                                      |                                                                                                                                      |                                                                                                                                       |                                                                                                                                       |
| $T_{\min}, T_{\max}$                                                         | 0.78, 0.95                                                                                                                           | 0.82, 0.95                                                                                                                           | 0.83, 0.95                                                                                                                           | 0.70, 0.95                                                                                                                            | 0.71, 0.95                                                                                                                            |
| No. of measured, independent and observed [ $I > 2.0\sigma(I)$ ] reflections | 24471, 745, 718                                                                                                                      | 4042, 386, 333                                                                                                                       | 4233, 399, 346                                                                                                                       | 8127, 1089, 824                                                                                                                       | 2069, 769, 511                                                                                                                        |
| $R_{\text{int}}$                                                             | 0.043                                                                                                                                | 0.048                                                                                                                                | 0.044                                                                                                                                | 0.088                                                                                                                                 | 0.183                                                                                                                                 |
| $\theta_{\text{max}}$ (°)                                                    | 26.4                                                                                                                                 | 25.0                                                                                                                                 | 25.6                                                                                                                                 | 23.3                                                                                                                                  | 20.8                                                                                                                                  |
| $(\sin \theta/\lambda)_{\text{max}}$ (Å <sup>-1</sup> )                      | 0.626                                                                                                                                | 0.595                                                                                                                                | 0.609                                                                                                                                | 0.556                                                                                                                                 | 0.501                                                                                                                                 |
| <b>Refinement</b>                                                            |                                                                                                                                      |                                                                                                                                      |                                                                                                                                      |                                                                                                                                       |                                                                                                                                       |
| $R[F^2 > 2\sigma(F^2)], wR(F^2), S$                                          | 0.024, 0.067, 1.04                                                                                                                   | 0.076, 0.190, 1.02                                                                                                                   | 0.076, 0.213, 1.04                                                                                                                   | 0.133, 0.276, 1.51                                                                                                                    | 0.177, 0.377, 1.30                                                                                                                    |
| No. of reflections                                                           | 745                                                                                                                                  | 379                                                                                                                                  | 399                                                                                                                                  | 1038                                                                                                                                  | 747                                                                                                                                   |
| No. of parameters                                                            | 32                                                                                                                                   | 31                                                                                                                                   | 31                                                                                                                                   | 44                                                                                                                                    | 50                                                                                                                                    |
| No. of restraints                                                            | 73                                                                                                                                   | 78                                                                                                                                   | 69                                                                                                                                   | 121                                                                                                                                   | 86                                                                                                                                    |
| $\Delta\rho_{\text{max}}, \Delta\rho_{\text{min}}$ (e Å <sup>-3</sup> )      | 0.36, -0.37                                                                                                                          | 1.89, -1.17                                                                                                                          | 1.26, -1.03                                                                                                                          | 1.34, -1.38                                                                                                                           | 1.46, -1.83                                                                                                                           |

**Supplementary Table S2.** Experimental and crystallographic data for Zn<sub>2</sub>bdc<sub>2</sub>dabco-X(DMF) (**2**) in a PTM of DMF or Fluorinert® FC-70 at  $T = 298$  K. Diffraction experiments were carried out using synchrotron radiation ( $\lambda = 0.48590$  Å). Absorption was corrected for by multi-scan methods, SADABS (Siemens, 1996).

|  | Ambient <sup>[a]</sup> | 0.10 GPa | 0.33 GPa | 0.10 GPa | 0.32 GPa |
|--|------------------------|----------|----------|----------|----------|
|--|------------------------|----------|----------|----------|----------|

| <b>Crystal data</b>                                                 |                                                                                                                                     |                                                                                                                                     |                                                                                                                                     |                                                                                                                                     |                                                                                                                                     |
|---------------------------------------------------------------------|-------------------------------------------------------------------------------------------------------------------------------------|-------------------------------------------------------------------------------------------------------------------------------------|-------------------------------------------------------------------------------------------------------------------------------------|-------------------------------------------------------------------------------------------------------------------------------------|-------------------------------------------------------------------------------------------------------------------------------------|
| PTM                                                                 | n/a                                                                                                                                 | DMF                                                                                                                                 | DMF                                                                                                                                 | Fluorinert® FC-70                                                                                                                   | Fluorinert® FC-70                                                                                                                   |
| Chemical formula                                                    | (C <sub>22</sub> H <sub>12</sub> N <sub>2</sub> O <sub>8</sub> Zn <sub>2</sub> ) <sub>n</sub> ·4n(C <sub>3</sub> H <sub>7</sub> NO) | (C <sub>22</sub> H <sub>12</sub> N <sub>2</sub> O <sub>8</sub> Zn <sub>2</sub> ) <sub>n</sub> ·4n(C <sub>3</sub> H <sub>7</sub> NO) | (C <sub>22</sub> H <sub>12</sub> N <sub>2</sub> O <sub>8</sub> Zn <sub>2</sub> ) <sub>n</sub> ·4n(C <sub>3</sub> H <sub>7</sub> NO) | (C <sub>22</sub> H <sub>12</sub> N <sub>2</sub> O <sub>8</sub> Zn <sub>2</sub> ) <sub>n</sub> ·4n(C <sub>3</sub> H <sub>7</sub> NO) | (C <sub>22</sub> H <sub>12</sub> N <sub>2</sub> O <sub>8</sub> Zn <sub>2</sub> ) <sub>n</sub> ·4n(C <sub>3</sub> H <sub>7</sub> NO) |
| M <sub>r</sub>                                                      | 855.49                                                                                                                              | 863.55                                                                                                                              | 863.55                                                                                                                              | 863.55                                                                                                                              | 863.55                                                                                                                              |
| Crystal system, space group                                         | Tetragonal, <i>I4/mcm</i>                                                                                                           | Tetragonal, <i>I4/mcm</i>                                                                                                           | Tetragonal, <i>P4/mmm</i>                                                                                                           | Tetragonal, <i>I4/mcm</i>                                                                                                           | Tetragonal, <i>I4/mcm</i>                                                                                                           |
| a, c (Å)                                                            | 15.1208(10), 19.314(2)                                                                                                              | 15.110(1), 19.2672(12)                                                                                                              | 10.6890(6), 9.6506(5)                                                                                                               | 15.130(18), 19.32(4)                                                                                                                | 14.9647(9), 19.266(4)                                                                                                               |
| V (Å <sup>3</sup> )                                                 | 4415.9(8)                                                                                                                           | 4398.9(6)                                                                                                                           | 1102.63(14)                                                                                                                         | 4423(14)                                                                                                                            | 4314.4(11)                                                                                                                          |
| Z                                                                   | 4                                                                                                                                   | 4                                                                                                                                   | 1                                                                                                                                   | 4                                                                                                                                   | 4                                                                                                                                   |
| ρ (g cm <sup>-3</sup> )                                             | 0.830                                                                                                                               | 1.15                                                                                                                                | 1.11                                                                                                                                | 1.14                                                                                                                                | 1.17                                                                                                                                |
| Crystal size (mm)                                                   | 0.25 × 0.16 × 0.13                                                                                                                  | 0.05 × 0.15 × 0.15                                                                                                                  | 0.05 × 0.15 × 0.15                                                                                                                  | 0.05 × 0.15 × 0.15                                                                                                                  | 0.05 × 0.15 × 0.15                                                                                                                  |
| <b>Data collection</b>                                              |                                                                                                                                     |                                                                                                                                     |                                                                                                                                     |                                                                                                                                     |                                                                                                                                     |
| T <sub>min</sub> , T <sub>max</sub>                                 | 0.04, 1.00                                                                                                                          | 0.73, 0.94                                                                                                                          | 0.58, 0.95                                                                                                                          | 0.70, 0.94                                                                                                                          | 0.57, 0.94                                                                                                                          |
| No. of measured, independent and observed [I > 2.0σ(I)] reflections | 5445, 1416, 850                                                                                                                     | 10160, 935, 575                                                                                                                     | 5314, 600, 506                                                                                                                      | 9425, 476, 386                                                                                                                      | 5869, 301, 244                                                                                                                      |
| R <sub>int</sub>                                                    | 0.055                                                                                                                               | 0.112                                                                                                                               | 0.093                                                                                                                               | 0.083                                                                                                                               | 0.068                                                                                                                               |
| θ <sub>max</sub> (°)                                                | 28.9                                                                                                                                | 15.7                                                                                                                                | 17.0                                                                                                                                | 17.2                                                                                                                                | 14.1                                                                                                                                |
| (sin θ/λ) <sub>max</sub> (Å <sup>-1</sup> )                         | 0.680                                                                                                                               | 0.625                                                                                                                               | 0.625                                                                                                                               | 0.610                                                                                                                               | 0.500                                                                                                                               |
| <b>Refinement</b>                                                   |                                                                                                                                     |                                                                                                                                     |                                                                                                                                     |                                                                                                                                     |                                                                                                                                     |
| R[F <sup>2</sup> > 2σ(F <sup>2</sup> )], wR(F <sup>2</sup> ), S     | 0.065, 0.214, 1.11                                                                                                                  | 0.101, 0.197, 0.98                                                                                                                  | 0.117, 0.203, 1.01                                                                                                                  | 0.179, 0.229, 1.08                                                                                                                  | 0.193, 0.221, 1.03                                                                                                                  |
| No. of reflections                                                  | 1416                                                                                                                                | 904                                                                                                                                 | 557                                                                                                                                 | 428                                                                                                                                 | 261                                                                                                                                 |
| No. of parameters                                                   | 70                                                                                                                                  | 70                                                                                                                                  | 51                                                                                                                                  | 70                                                                                                                                  | 48                                                                                                                                  |
| No. of restraints                                                   | 18                                                                                                                                  | 165                                                                                                                                 | 167                                                                                                                                 | 165                                                                                                                                 | 79                                                                                                                                  |
| Δρ <sub>max</sub> , Δρ <sub>min</sub> (e Å <sup>-3</sup> )          | 0.66, -0.56                                                                                                                         | 1.79, -1.28                                                                                                                         | 1.74, -0.79                                                                                                                         | 0.46, -0.37                                                                                                                         | 0.65, -0.60                                                                                                                         |

[a] From CSD reference: 'HIVSAI' (deposit no. 986887)<sup>12a</sup> at ambient pressure and 270 K

**Supplementary Table S3.** Experimental and crystallographic data for Zn<sub>2</sub>bdc<sub>2</sub>dabco·3(Benzene) (**3**) in a PTM of benzene or Fluorinert® FC-70 at T = 298 K. Diffraction experiments were carried out on a Bruker Apex II using a Mo X-ray source. Absorption was corrected for by multi-scan methods, SADABS (Siemens, 1996).

|                     | <b>0.15 GPa</b>                                                                                                                   | <b>0.20 GPa</b>                                                                                                   |
|---------------------|-----------------------------------------------------------------------------------------------------------------------------------|-------------------------------------------------------------------------------------------------------------------|
| <b>Crystal data</b> |                                                                                                                                   |                                                                                                                   |
| PTM                 | Benzene                                                                                                                           | Fluorinert® FC-70                                                                                                 |
| Chemical formula    | (C <sub>22</sub> H <sub>12</sub> N <sub>2</sub> O <sub>8</sub> Zn <sub>2</sub> ) <sub>n</sub> ·2n(C <sub>6</sub> H <sub>6</sub> ) | C <sub>22</sub> H <sub>12</sub> N <sub>2</sub> O <sub>8</sub> Zn <sub>2</sub> ·2n(C <sub>6</sub> H <sub>6</sub> ) |

|                              |                                        |                                     |
|------------------------------|----------------------------------------|-------------------------------------|
| $M_r$                        | 733.44                                 | 733.44                              |
| Crystal system, space group  | Orthorhombic, <i>Cmmm</i>              | Orthorhombic, <i>Cmmm</i>           |
| $a, b, c$ (Å)                | 13.6785 (13), 16.9282 (15), 9.6888 (8) | 13.575 (3), 16.993 (3), 9.6680 (11) |
| $V$ (Å <sup>3</sup> )        | 2243.5 (3)                             | 2230.3 (7)                          |
| $Z$                          | 2                                      | 2                                   |
| $\rho$ (g cm <sup>-3</sup> ) | 1.11                                   | 1.12                                |
| Crystal size (mm)            | 0.05 × 0.15 × 0.15                     | 0.05 × 0.15 × 0.15                  |

---

**Data collection**

|                                                                              |                |                |
|------------------------------------------------------------------------------|----------------|----------------|
| $T_{\min}, T_{\max}$                                                         | 0.58, 0.95     | 0.71, 0.95     |
| No. of measured, independent and observed [ $I > 2.0\sigma(I)$ ] reflections | 3438, 682, 572 | 2039, 490, 351 |
| $R_{\text{int}}$                                                             | 0.068          | 0.082          |
| $\theta_{\max}$ (°)                                                          | 23.3           | 22.0           |
| $(\sin \theta/\lambda)_{\max}$ (Å <sup>-1</sup> )                            | 0.556          | 0.527          |

---

**Refinement**

|                                                             |                    |                    |
|-------------------------------------------------------------|--------------------|--------------------|
| $R[F^2 > 2\sigma(F^2)], wR(F^2), S$                         | 0.084, 0.210, 1.01 | 0.113, 0.287, 1.01 |
| No. of reflections                                          | 667                | 485                |
| No. of parameters                                           | 91                 | 54                 |
| No. of restraints                                           | 185                | 144                |
| $\Delta\rho_{\max}, \Delta\rho_{\min}$ (e Å <sup>-3</sup> ) | 0.68, -1.02        | 1.16, -0.97        |

---

## 2. Pore Volume and Guest Content

**Supplementary Table S4.** Ethanol content per pore of  $\text{Zn}_2\text{bdc}_2\text{dabco}\cdot\text{X}(\text{EtOH})$  (**1**) at variable pressure in a PTM of EtOH. Pore content and volume was calculated using the SQUEEZE algorithm in PLATON.<sup>5</sup>

|                                  | Ambient | 0.31 GPa | 0.69 GPa | 1.19 GPa | 2.10 GPa |
|----------------------------------|---------|----------|----------|----------|----------|
| Pore $V$ ( $\text{\AA}^3$ )      | 695     | 719      | 720      | 1431     | 1330     |
| Red. pore $V$ ( $\text{\AA}^3$ ) | 695     | 719      | 720      | 716      | 665      |
| $e^-$ count per unit cell        | 102     | 202      | 211      | 620      | 617      |
| EtOH per pore                    | 3.9     | 7.8      | 8.1      | 11.9     | 11.9     |

**Supplementary Table S5.**  $N,N$ -Dimethylformamide content per pore of  $\text{Zn}_2\text{bdc}_2\text{dabco}\cdot\text{X}(\text{DMF})$  (**2**) at variable pressure in a PTM of DMF or Fluorinert FC-70<sup>®</sup>. Pore content and volume was calculated using the SQUEEZE algorithm in PLATON.<sup>5</sup>

|                                  | 0.1 GPa | 0.33 GPa | 0.10 GPa | 0.32 GPa |
|----------------------------------|---------|----------|----------|----------|
| PTM                              | DMF     | DMF      | FC-70    | FC-70    |
| Pore $V$ ( $\text{\AA}^3$ )      | 438     | 511      | 2586     | 502      |
| Red. pore $V$ ( $\text{\AA}^3$ ) | 438     | 511      | 646.5    | 502      |
| $e^-$ count                      | 852     | 1011     | 1011     | 158      |
| DMF per pore                     | 5.5     | 4.5      | 6.5      | 4.1      |

## 3. Thermogravimetric Analysis

Thermogravimetric and differential thermal analysis (TG-DTA) was performed on a TA Instruments Q600 (sample weight approximately 5-10 mg) under nitrogen flow (flow rate 100 mL min<sup>-1</sup>) in the temperature range from 25 °C to 600 °C with a heating rate of 10 °C min<sup>-1</sup>. The solvated samples were taken out of the respective solvent (DMF, EtOH, or benzene), air-dried for approximately 1 h and placed in alumina crucibles for the measurement.

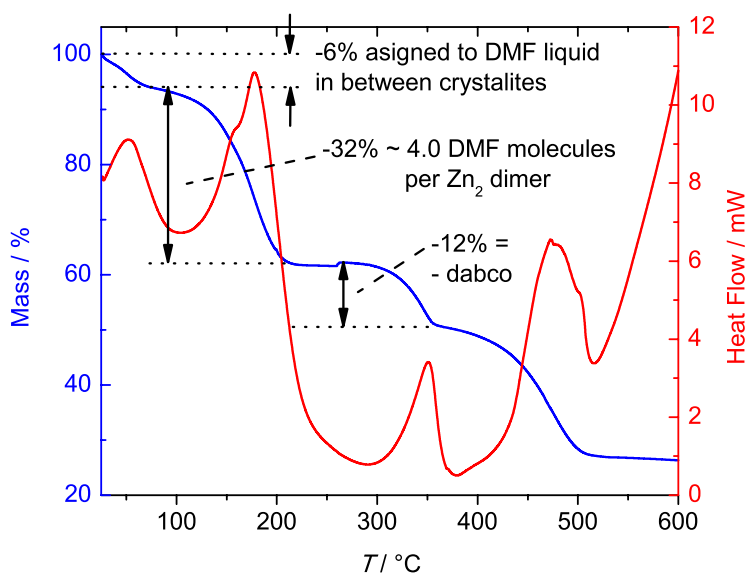

**Figure S1:** TG/DTA trace 2. 32% weight loss up to a temperature of ~200 °C corresponds to the loss of 4.0 DMF molecules per formula unit of Zn<sub>2</sub>bdc<sub>2</sub>dabco. This is in excellent agreement with the single crystal XRD data. The second step in the range from 300 to 350 °C corresponds to the loss of dabco.

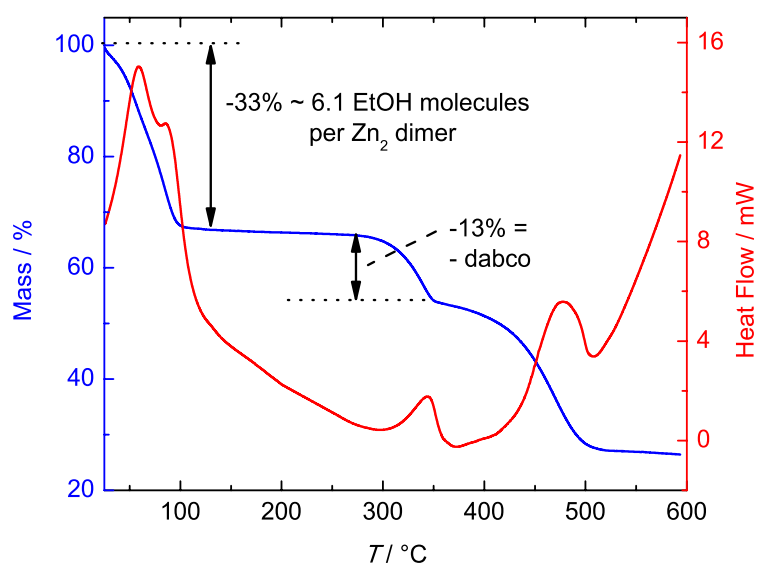

**Figure S2:** TG/DTA trace of 1. 33% weight loss up to a temperature of ~100 °C corresponds to the loss of 6.1 EtOH molecules per formula unit of Zn<sub>2</sub>(bdc)<sub>2</sub>dabco. The second step in the range from 300 to 350 °C corresponds to the loss of dabco.

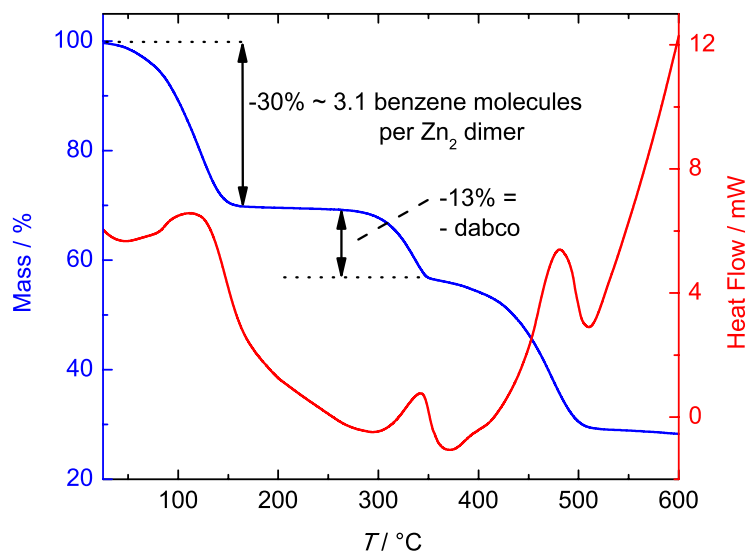

**Figure S3:** TG/DTA trace of **3**. 30% weight loss up to a temperature of  $\sim 150^\circ\text{C}$  corresponds to the loss of 3.1 benzene molecules per formula unit of  $\text{Zn}_2\text{bdc}_2\text{dabco}$ . Only two benzene molecules per formula unit could be located crystallographically, suggesting further disorder of the benzene guests. The second step in the range from  $300$  to  $350^\circ\text{C}$  corresponds to the loss of dabco.



#### 4. FT-IR spectroscopy

IR spectroscopy was carried out on air-dried samples on a Bruker Tensor 27 FT-IR spectrometer ( $\tilde{\nu} = 520 \text{ cm}^{-1} - 4000 \text{ cm}^{-1}$ ) in reflection mode using a diamond ATR (attenuated total reflectance) unit.

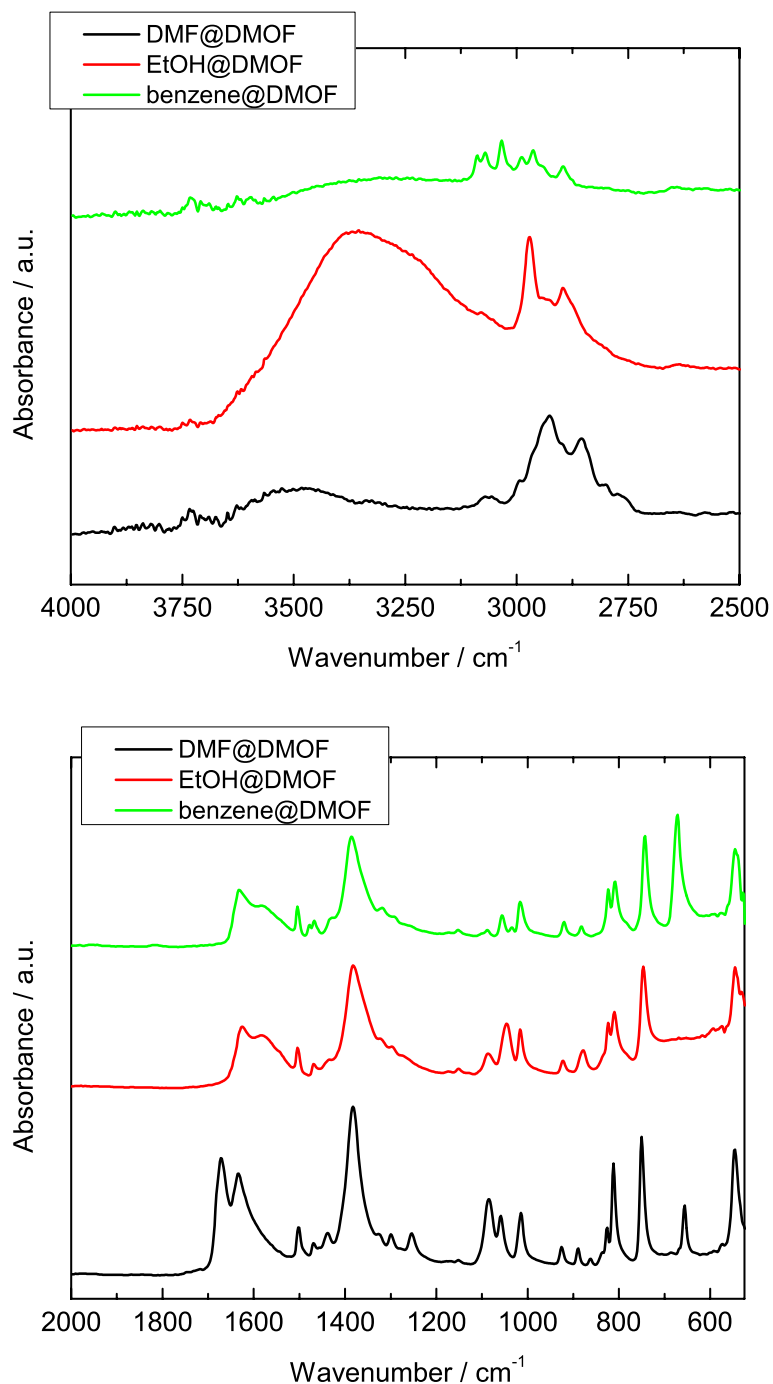

**Figure S4:** ATR-FTIR spectra of **1** (EtOH@Zn<sub>2</sub>bdc<sub>2</sub>dabco), **2** (DMF@Zn<sub>2</sub>bdc<sub>2</sub>dabco), and **3** (Benzene@Zn<sub>2</sub>bdc<sub>2</sub>dabco). Top: Spectral region from 2500 to 4000 cm<sup>-1</sup>. Bottom: Spectral region from 500 to 2000 cm<sup>-1</sup>. The specific vibrational bands of the respective guest molecules are observed.

## 5 Twin Analysis

The structural phase transition of the ethanol-containing framework, **1**, during compression in a PTM of ethanol from  $P4/mmm$  to  $C2/m$  is accompanied by a three-fold reduction in symmetry, thereby inducing twinning of the crystal. Two twin laws were found using ROTAX in CRYSTALS, as listed below.

$$\text{Twin law 1: } \begin{pmatrix} 1 & 0 & 0 \\ -0 & -1 & 0 \\ -0.051 & 0 & -1 \end{pmatrix} \times \begin{pmatrix} a \\ b \\ c \end{pmatrix} = \begin{pmatrix} a & 0 & 0 \\ -0 & -b & 0 \\ -0.051a & 0 & -c \end{pmatrix} \quad (\text{figure of merit} = 8.171)$$

$$\text{Twin law 2: } \begin{pmatrix} 1 & 0 & 0.112 \\ 0 & -1 & 0 \\ 0 & 0 & -1 \end{pmatrix} \times \begin{pmatrix} a \\ b \\ c \end{pmatrix} = \begin{pmatrix} a & 0 & 0.112c \\ 0 & -b & 0 \\ 0 & 0 & -c \end{pmatrix} \quad (\text{figure of merit} = 8.709)$$

Twinning in framework, **1**, was also evidenced from synthetic precession images (Figure S5), where the separate components could be clearly resolved.

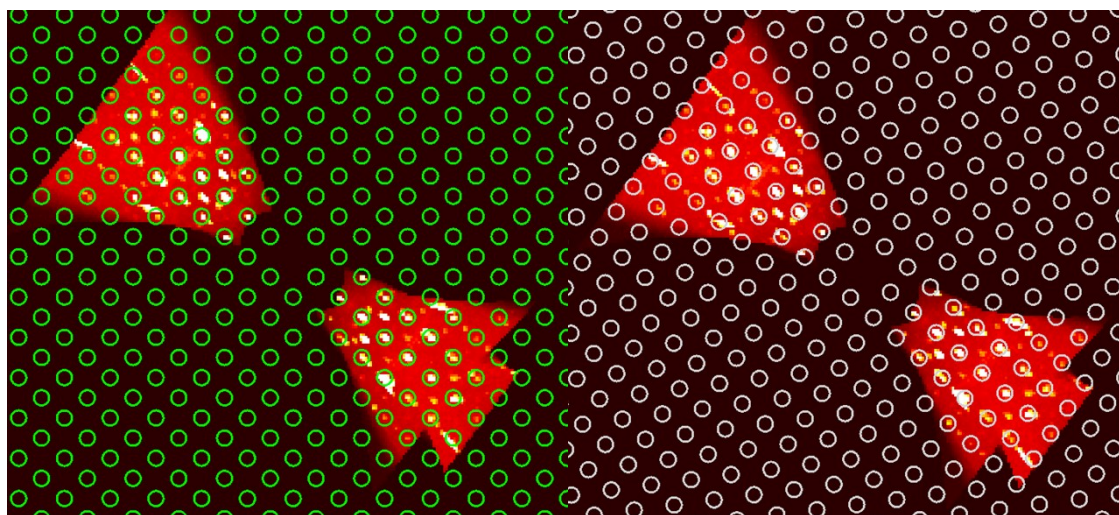

**Figure S5:** Framework, **1**, showing  $hk0$  synthetic precession image. Note the two overlays from the predicted positions for reflections from component 1 (green overlay) and 2 (white overlay) caused by the phase transition.

## References

- (1) Piermanrini, S. B. G. J., Barnett, J. D., Forman, R. A., *J Appl Phys*, **1975**, *46*, 2774-2780
- (2) Bruker, Madison, Wisconsin, USA, 2006
- (3) Krause, R. H.-I. L., Sheldrick, D. M., Stalke, D., *J Appl Cryst*, **2013**, *48*, 3-10
- (4) Betteridge, P.W., Carruthers, J. R., Cooper, R. I., Prout, K. P., Watkin, D. J., *J Appl Cryst*, **2003**, *36*, 1487
- (5) Spek, A. L., *Acta Cryst C*, **2015**, *71*, 9-18
- (6) Dawson, A., Parsons, S., Ruf, M., *J Appl Cryst*, **2004**, *37*, 410-416
- (7) Parsons, S., 2004
